# Supplementary material for: Two rare meroterpenoidal rotamers from Ganoderma applanatum
Source: Royal Society of Chemistry journal article supplement (doi:10.1039/c6ra26572c), 2017-01-01
Supplement: c6ra26572c1.pdf [file c6ra26572c1.pdf]

## Electronic Supplementary Information

### Two rare meroterpenoidal rotamers from *Ganoderma applanatum*

Qi Luo <sup>a,b</sup>, Zheng-Chao Tu <sup>c</sup>, Yong-Xian Cheng <sup>a\*</sup>

<sup>a</sup> *State Key Laboratory of Phytochemistry and Plant Resources in West China, Kunming Institute of Botany, Chinese Academy of Sciences, Kunming 650201, PR China*

<sup>b</sup> *University of Chinese Academy of Sciences, Beijing 100049, PR China*

<sup>c</sup> *Guangzhou Institutes of Biomedicine and Health, Chinese Academy of Sciences, Guangzhou 510530, PR China*

\*Corresponding author. E-mail address: yxcheng@mail.kib.ac.cn (Y.-X.C)

## Contents

1. The  $^{13}\text{C}$  NMR calculation of **1** and **2**
2. HPLC peak areas of a mixture of (-)-**1** and (-)-**2** at varied temperatures (Table)
3. Supplementary Figures
  - Figure S1.  $^1\text{H}$  NMR spectrum of **1** in pyridine- $d_5$
  - Figure S2.  $^{13}\text{C}$  NMR spectrum of **1** in pyridine- $d_5$
  - Figure S3. HSQC spectrum of **1** in pyridine- $d_5$
  - Figure S4. HMBC spectrum of **1** in pyridine- $d_5$
  - Figure S5.  $^1\text{H}$ - $^1\text{H}$  COSY spectrum of **1** in pyridine- $d_5$
  - Figure S6. ROESY spectrum of **1** in pyridine- $d_5$
  - Figure S7. HREIMS spectrum of **1**
  - Figure S8.  $^1\text{H}$  NMR spectrum of **1** in methanol- $d_4$
  - Figure S9.  $^{13}\text{C}$  NMR and DEPT spectra of **1** in methanol- $d_4$
  - Figure S10. HSQC spectrum of **1** in methanol- $d_4$
  - Figure S11. HMBC spectrum of **1** in methanol- $d_4$
  - Figure S12.  $^1\text{H}$ - $^1\text{H}$  COSY spectrum of **1** in methanol- $d_4$
  - Figure S13. ROESY spectrum of **1** in methanol- $d_4$
  - Figure S14.  $^1\text{H}$  NMR spectrum of **2** in methanol- $d_4$
  - Figure S15.  $^{13}\text{C}$  NMR and DEPT spectra of **2** in methanol- $d_4$
  - Figure S16. HSQC spectrum of **2** in methanol- $d_4$
  - Figure S17. HMBC spectrum of **2** in methanol- $d_4$
  - Figure S18.  $^1\text{H}$ - $^1\text{H}$  COSY spectrum of **2** in methanol- $d_4$
  - Figure S19. ROESY spectrum of **2** in methanol- $d_4$
  - Figure S20. HREIMS spectrum of **2**

## 1. The $^{13}\text{C}$ NMR calculation of 1 and 2

### Computational Methods

The CONFLEX 7 searches based on molecular mechanics with MMFF94S force fields were performed for model compounds of 3'R,6'R,7'S,10'S,11'R and 3'R,6'R,7'S,10'R,11'S. All of the predominant conformers (90%) were optimized by DFT calculation at B3LYP/6-311 G (d, p) level with the PCM in MeOH. All the above calculations were carried out with the Gaussian 09 package of programs. Under the circumstances, the calculation of their  $^{13}\text{C}$  NMR chemical shifts at MPW1PW91-SCRF/6-311+G (2d, p) level with the PCM in MeOH was performed. Boltzmann averaging over all accessible conformers according to

$$\bar{\sigma}^x = \frac{\sum_{\text{confSi}} \sigma_i^x g_i \exp(-E_i/RT)}{\sum_{\text{confSi}} g_i \exp(-E_i/RT)}$$

Where  $\bar{\sigma}^x$  is the Boltzmann-averaged calculated shielding constant for portion  $x$ ,  $\sigma_i^x$  is the shielding constant for portion  $x$  in conformer  $i$ , and  $E_i$  is the potential energy of conformer  $i$  (relative to the global minimum)  $\text{kJ mol}^{-1}$ , obtained from a single-point solvent calculation on the gas-phase structures as discussed previously.  $R$  is the molar gas constant ( $8.3145 \text{ J K}^{-1} \text{ mol}^{-1}$ ),  $g_i$  is the degeneracy of conformer  $i$ , and the temperature  $T$  was taken as  $298.15 \text{ K}$ .

Chemical shifts were then calculated according to

$$\delta_{\text{calc}}^x = \frac{\sigma_{\text{ref}} - \bar{\sigma}^x}{1 - 10^{-6} \sigma_{\text{ref}}}$$

Where  $\delta_{\text{calc}}^x$  is the calculated chemical shift for portion  $x$  (in ppm),  $\bar{\sigma}^x$  is the shielding constant for carbon  $x$  as calculated above (again in ppm) and  $\sigma_{\text{ref}}$  is the shielding constant for the carbon in tetramethylsilane (TMS). This last value was obtained by minimizing TMS in MeOH at the MPW1PW91-SCRF/6-311+G (2d, p) level and calculating the shielding constant for this structure again at the MPW1PW91-SCRF/6-311+G (2d, p) level; the value obtained was  $\sigma_{\text{ref}} = 188.0549 \text{ ppm}$ .

The parameters  $a$  and  $b$  of the linear regression  $\delta_{\text{calcd}} = a\delta_{\text{exptl}} + b$ ; the correlation coefficient,  $R^2$ ; the mean absolute error (MAE) defined as  $\sum n |\delta_{\text{calcd}} - \delta_{\text{exptl}}|/n$ ; the corrected mean absolute error (CMAE), defined as  $\sum n |\delta_{\text{corr}} - \delta_{\text{exptl}}|/n$ , where  $\delta_{\text{corr}} =$

$(\delta_{\text{calcd}} - b)/a$  and therefore corrects for systematic errors were presented.

**Table S1.** Comparison of MPW1PW91-SCRF/6-311+G (2d, p) calculated chemical shifts of (3'*R*,6'*R*,7'*S*,10'*S*,11'*R*)-**1** and (3'*R*,6'*R*,7'*S*,10'*R*,11'*S*)-**1** with the <sup>13</sup>C NMR experimental data ( $\delta$  in ppm) of **1** in MeOH.

|      | <b>1</b>                |                        | (3' <i>R</i> ,6' <i>R</i> ,7' <i>S</i> ,10' <i>S</i> ,11' <i>R</i> )- <b>1</b> |                        | (3' <i>R</i> ,6' <i>R</i> ,7' <i>S</i> ,10' <i>R</i> ,11' <i>S</i> )- <b>1</b> |  |
|------|-------------------------|------------------------|--------------------------------------------------------------------------------|------------------------|--------------------------------------------------------------------------------|--|
| No.  | $\delta_{\text{exptl}}$ | $\delta_{\text{corr}}$ | $\Delta\delta_{\text{C}}^a$                                                    | $\delta_{\text{corr}}$ | $\Delta\delta_{\text{C}}^a$                                                    |  |
| 1    | 156.4                   | 157.8                  | 1.4                                                                            | 161.5                  | 5.1                                                                            |  |
| 2    | 120.0                   | 119.3                  | 0.7                                                                            | 121.8                  | 1.8                                                                            |  |
| 3    | 115.3                   | 115.3                  | 0.0                                                                            | 118.2                  | 2.9                                                                            |  |
| 4    | 150.8                   | 148.8                  | 2.0                                                                            | 152.4                  | 1.6                                                                            |  |
| 5    | 126.5                   | 125.5                  | 1.0                                                                            | 128.5                  | 2.0                                                                            |  |
| 6    | 119.9                   | 118.8                  | 1.1                                                                            | 121.3                  | 1.4                                                                            |  |
| 1'   | 205.1                   | 206.3                  | 1.2                                                                            | 211.4                  | 6.3                                                                            |  |
| 2'   | 45.4                    | 42.6                   | 2.8                                                                            | 44.5                   | 0.9                                                                            |  |
| 3'   | 54.3                    | 56.5                   | 2.2                                                                            | 57.9                   | 3.6                                                                            |  |
| 4'   | 35.8                    | 32.0                   | 3.8                                                                            | 32.2                   | 3.6                                                                            |  |
| 5'   | 31.5                    | 34.5                   | 3.0                                                                            | 36.3                   | 4.8                                                                            |  |
| 6'   | 74.7                    | 78.9                   | 4.2                                                                            | 81.4                   | 6.7                                                                            |  |
| 7'   | 55.6                    | 62.5                   | 6.9                                                                            | 65.1                   | 9.5                                                                            |  |
| 8'   | 68.9                    | 67.4                   | 1.5                                                                            | 68.5                   | 0.4                                                                            |  |
| 9'   | 185                     | 186.2                  | 1.2                                                                            | 191.3                  | 6.3                                                                            |  |
| 10'  | 106.8                   | 104.2                  | 2.6                                                                            | 107.2                  | 0.4                                                                            |  |
| 11'  | 77.8                    | 77.2                   | 0.6                                                                            | 77.7                   | 0.1                                                                            |  |
| 12'  | 67.7                    | 65.7                   | 2.0                                                                            | 66.9                   | 0.8                                                                            |  |
| 13'  | 62.2                    | 60.3                   | 1.9                                                                            | 61.1                   | 1.1                                                                            |  |
| CMAE |                         |                        | 2.1                                                                            |                        | 3.1                                                                            |  |

$$^a\Delta\delta_{\text{C}} = |\delta_{\text{corr}} - \delta_{\text{exptl}}|$$

**Table S2.** Comparison of MPW1PW91-SCRF/6-311+G (2d, p) calculated chemical shifts of (3'R,6'R,7'S,10'S,11'R)-**2** and (3'R,6'R,7'S,10'R,11'S)-**2** with the <sup>13</sup>C NMR experimental data ( $\delta$  in ppm) of **2** in MeOH.

| <b>2</b> |                         | (3'R,6'R,7'S,10'S,11'R)- <b>2</b> |                             | (3'R,6'R,7'S,10'R,11'S)- <b>2</b> |                             |
|----------|-------------------------|-----------------------------------|-----------------------------|-----------------------------------|-----------------------------|
| No.      | $\delta_{\text{exptl}}$ | $\delta_{\text{corr}}$            | $\Delta\delta_{\text{C}}^a$ | $\delta_{\text{corr}}$            | $\Delta\delta_{\text{C}}^a$ |
| 1        | 156.4                   | 157.8                             | 1.4                         | 157.7                             | 1.3                         |
| 2        | 120.1                   | 119.3                             | 0.8                         | 118.9                             | 1.2                         |
| 3        | 115.3                   | 115.4                             | 0.1                         | 115.5                             | 0.2                         |
| 4        | 150.8                   | 148.8                             | 2.0                         | 148.8                             | 2.0                         |
| 5        | 126.3                   | 125.6                             | 0.7                         | 125.5                             | 0.8                         |
| 6        | 119.9                   | 118.9                             | 1.0                         | 118.5                             | 1.4                         |
| 1'       | 205.1                   | 206.2                             | 1.1                         | 206.3                             | 1.2                         |
| 2'       | 45.3                    | 42.7                              | 2.6                         | 43.6                              | 1.7                         |
| 3'       | 54.5                    | 56.7                              | 2.2                         | 56.6                              | 2.1                         |
| 4'       | 35.6                    | 32.2                              | 3.4                         | 31.6                              | 4.0                         |
| 5'       | 31.9                    | 34.7                              | 2.8                         | 35.6                              | 3.7                         |
| 6'       | 74.9                    | 79.0                              | 4.1                         | 79.5                              | 4.6                         |
| 7'       | 55.5                    | 62.7                              | 7.2                         | 63.7                              | 8.2                         |
| 8'       | 68.8                    | 67.5                              | 1.3                         | 67.0                              | 1.8                         |
| 9'       | 185                     | 186.1                             | 1.1                         | 186.8                             | 1.8                         |
| 10'      | 106.8                   | 104.3                             | 2.5                         | 104.8                             | 2.0                         |
| 11'      | 78.2                    | 77.3                              | 0.9                         | 76.0                              | 2.2                         |
| 12'      | 67.6                    | 65.8                              | 1.8                         | 65.5                              | 2.1                         |
| 13'      | 63.6                    | 60.4                              | 3.2                         | 59.8                              | 3.8                         |
| CMAE     |                         |                                   | 2.1                         |                                   | 2.4                         |

$$^a\Delta\delta_{\text{C}} = |\delta_{\text{corr}} - \delta_{\text{exptl}}|$$

## 2. HPLC peak areas of a mixture of (-)-**1** and (-)-**2** at varied temperatures

**Table S3.** HPLC peak areas of a mixture of (-)-**1** and (-)-**2** at varied temperatures

| Temperature | (-)- <b>1</b> | (-)- <b>2</b> | Proportion |
|-------------|---------------|---------------|------------|
| 15 °C       | 11233         | 4312          | 2.6:1      |
| 30 °C       | 11665         | 4477          | 2.6:1      |
| 45 °C       | 11598         | 4530          | 2.6:1      |

## 3. Supplementary Figures

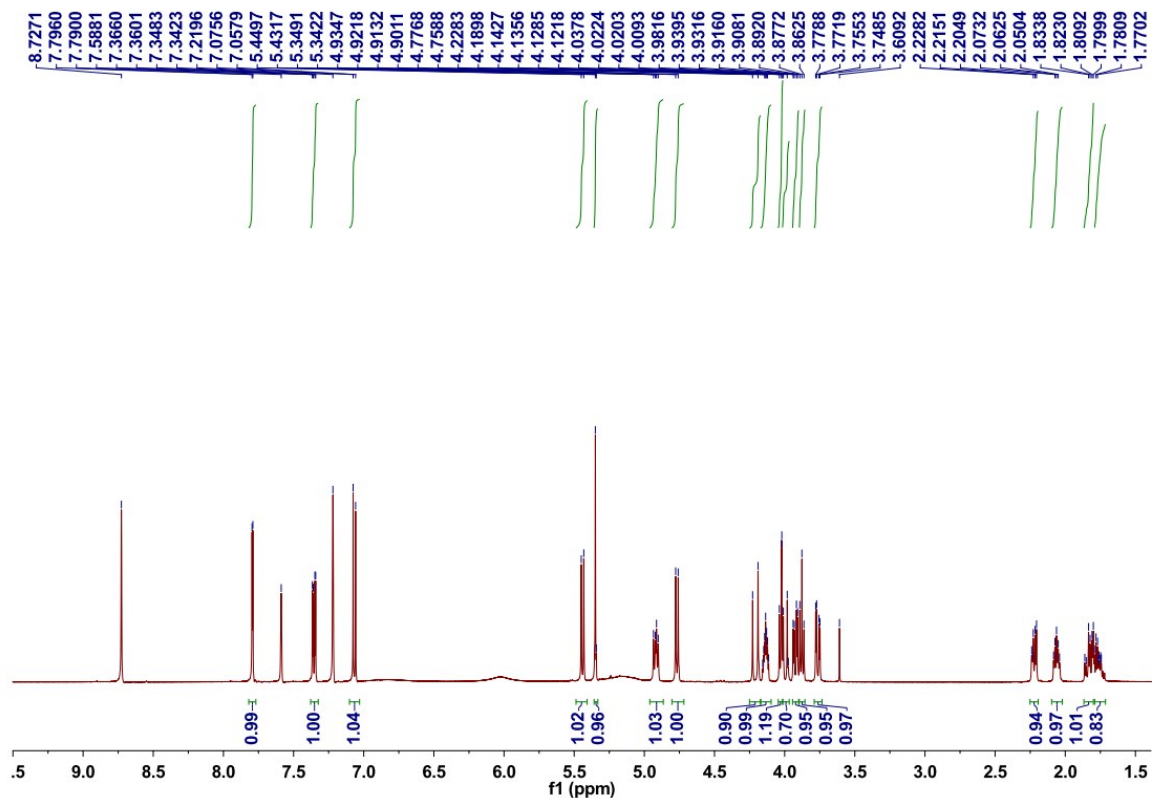

Figure S1.  $^1\text{H}$  NMR spectrum of **1** in pyridine- $d_5$

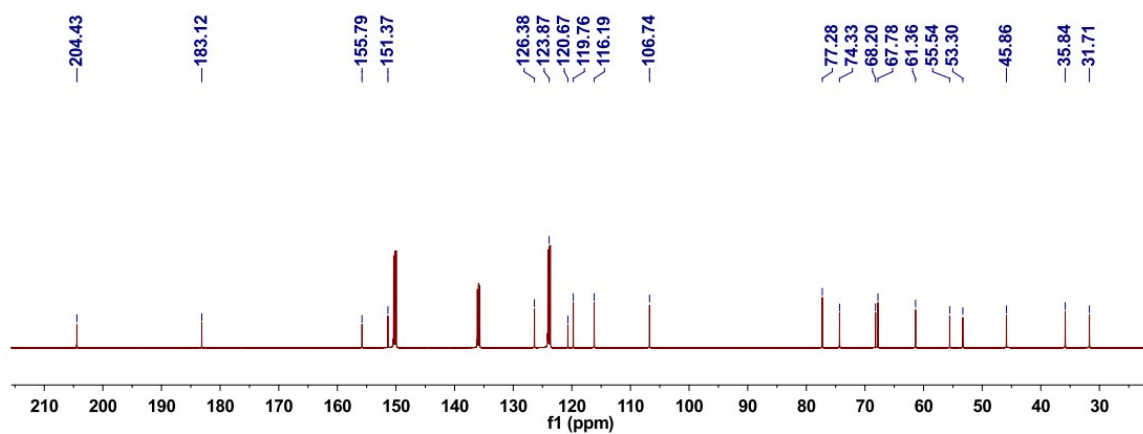

Figure S2.  $^{13}\text{C}$  NMR spectrum of **1** in pyridine- $d_5$

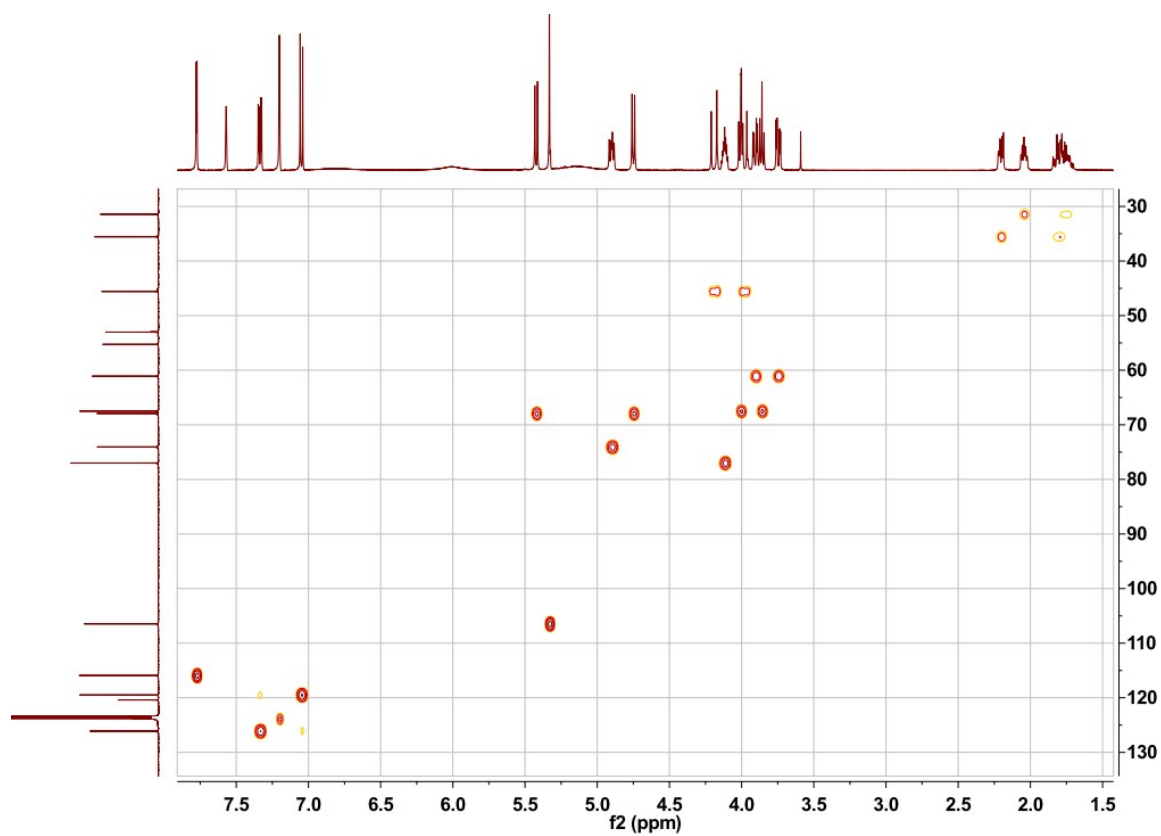

Figure S3. HSQC spectrum of **1** in pyridine- $d_5$

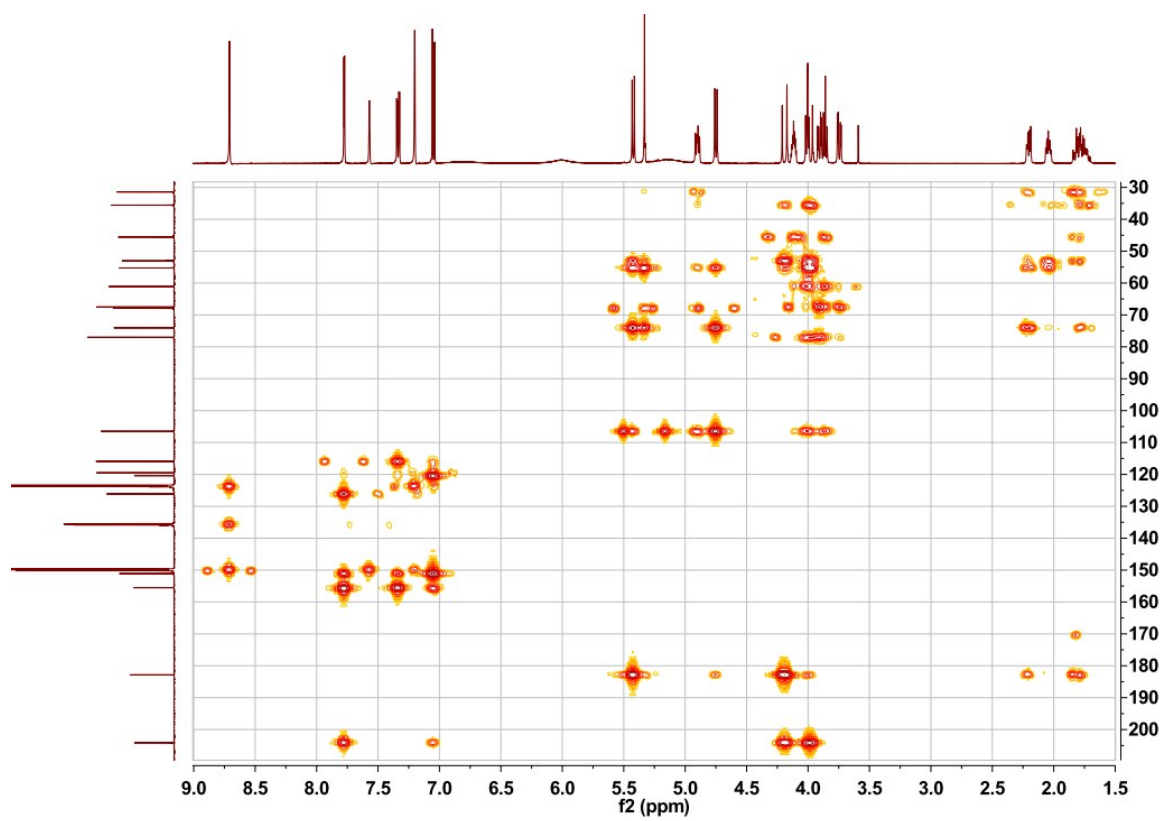

Figure S4. HMBC spectrum of **1** in pyridine- $d_5$

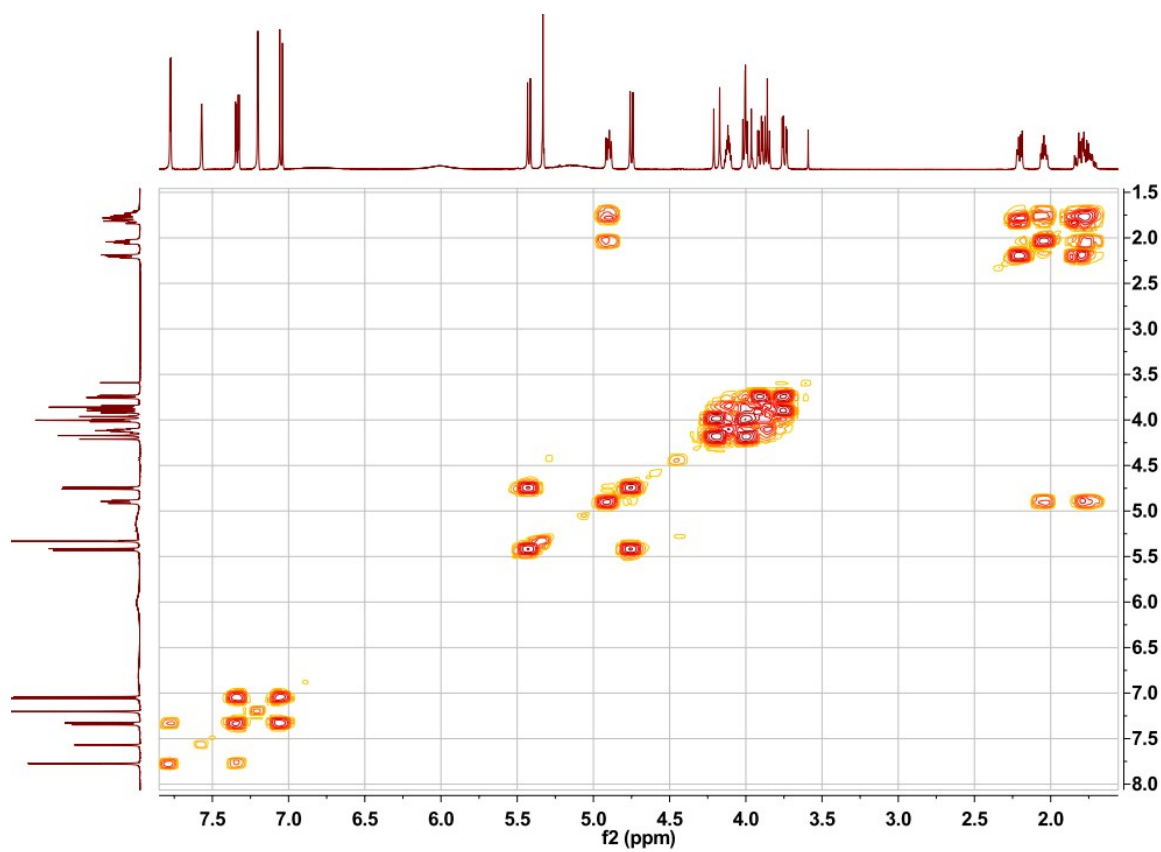

Figure S5.  $^1\text{H}$ - $^1\text{H}$  COSY spectrum of **1** in pyridine- $d_5$

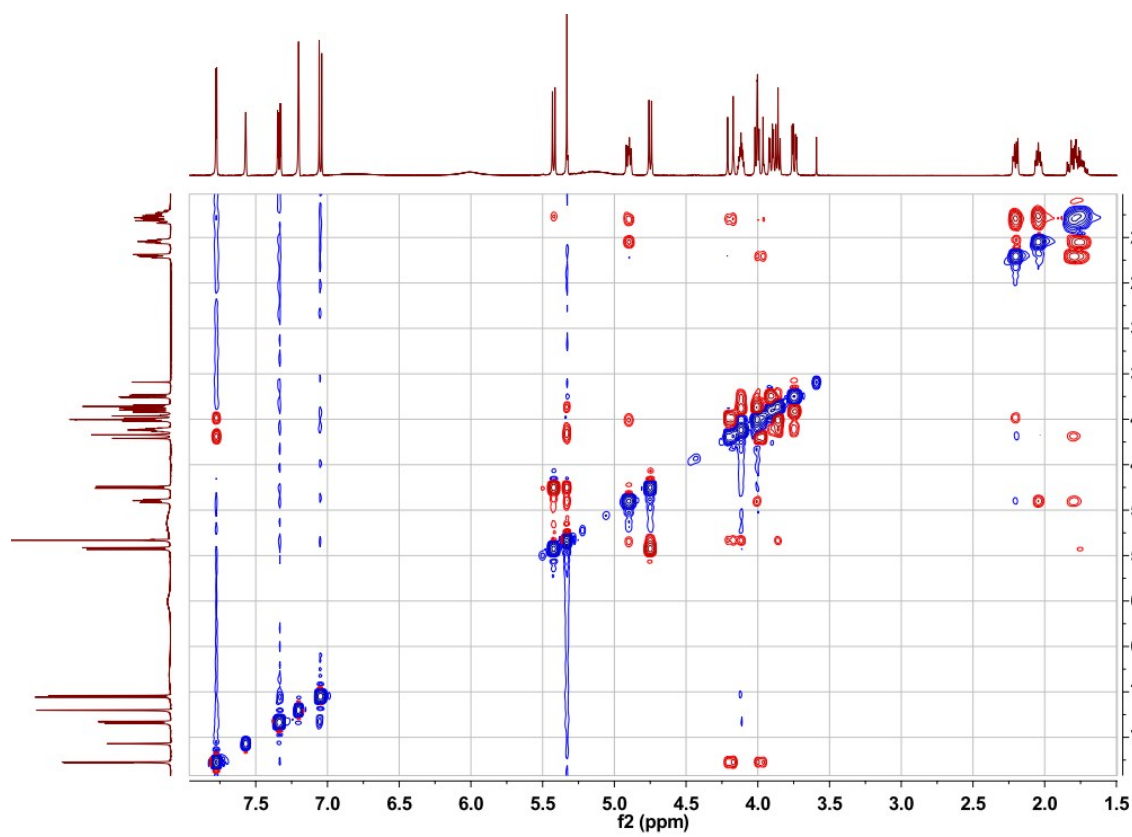

Figure S6. ROESY spectrum of **1** in pyridine- $d_5$



### Single Mass Analysis

Tolerance = 10.0 PPM / DBE: min = -10.0, max = 120.0

Selected filters: None

Monoisotopic Mass, Odd and Even Electron Ions

16 formula(e) evaluated with 1 results within limits (up to 51 closest results for each mass)

Elements Used:

C: 0-200 H: 0-400 O: 8-10

QPG-30

09:19:28 22-Apr-2015

Voltage EI+

KIB  
M150422EA-03AFAMM 40 (3.672)  
394.1266

Autospec Premier  
P776  
22.6

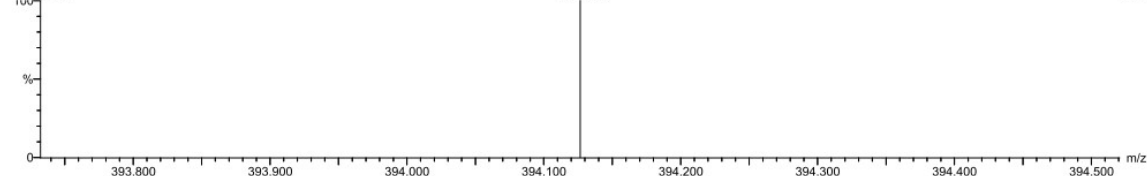

| Mass     | Calc. Mass | mDa | PPM | DBE | i-FIT     | Formula    |
|----------|------------|-----|-----|-----|-----------|------------|
| 394.1266 | 394.1264   | 0.2 | 0.5 | 9.0 | 5546029.0 | C19 H22 O9 |

Figure S7. HREIMS spectrum of **1**

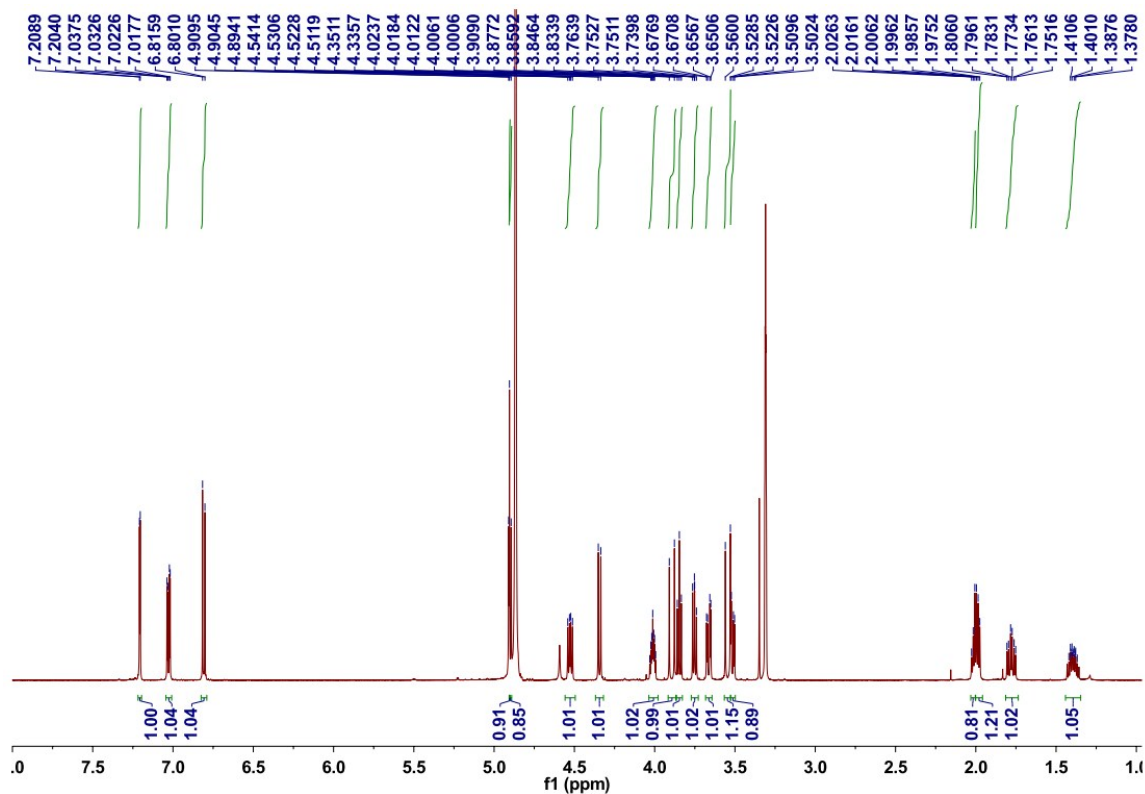

Figure S8. <sup>1</sup>H NMR spectrum of **1** in methanol-*d*<sub>4</sub>

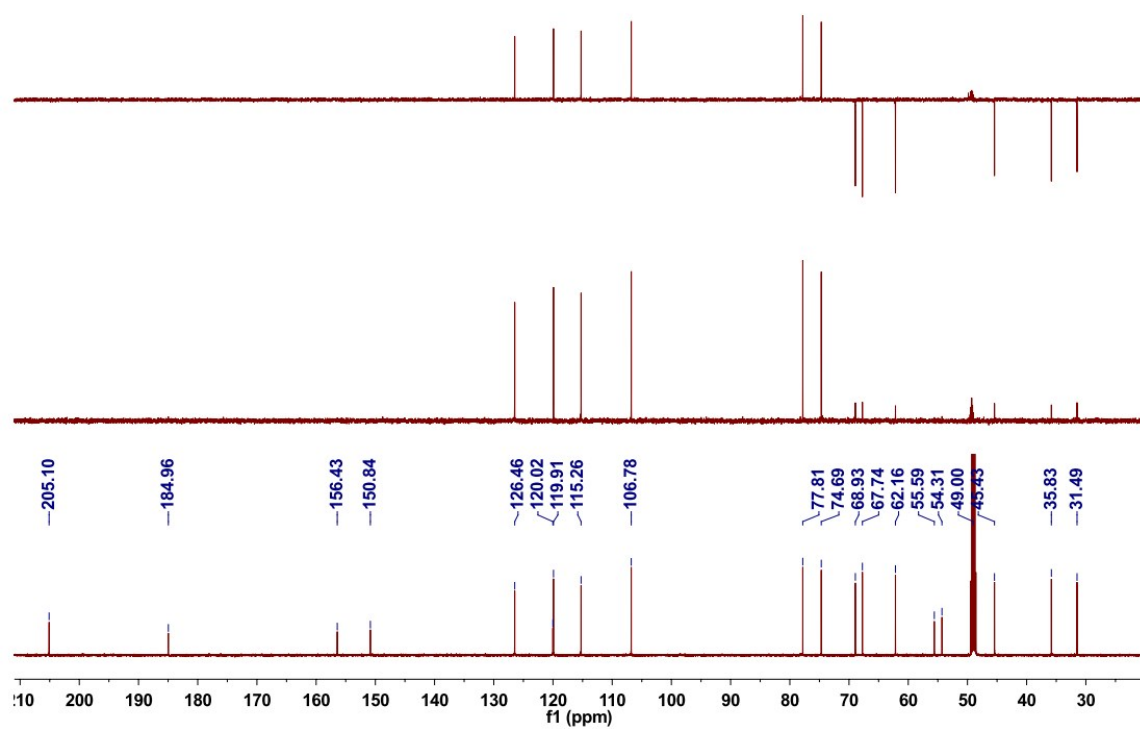

Figure S9.  $^{13}\text{C}$  NMR and DEPT spectra of **1** in methanol- $d_4$

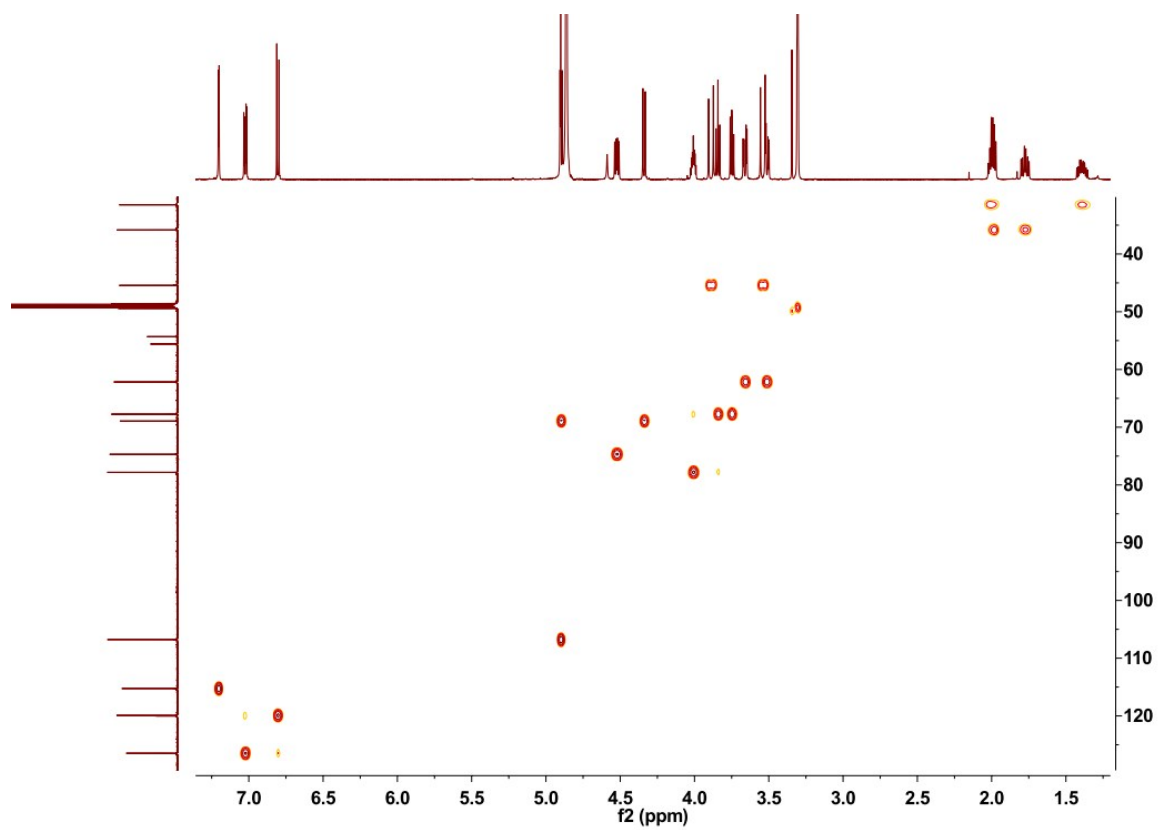

Figure S10. HSQC spectrum of **1** in methanol- $d_4$

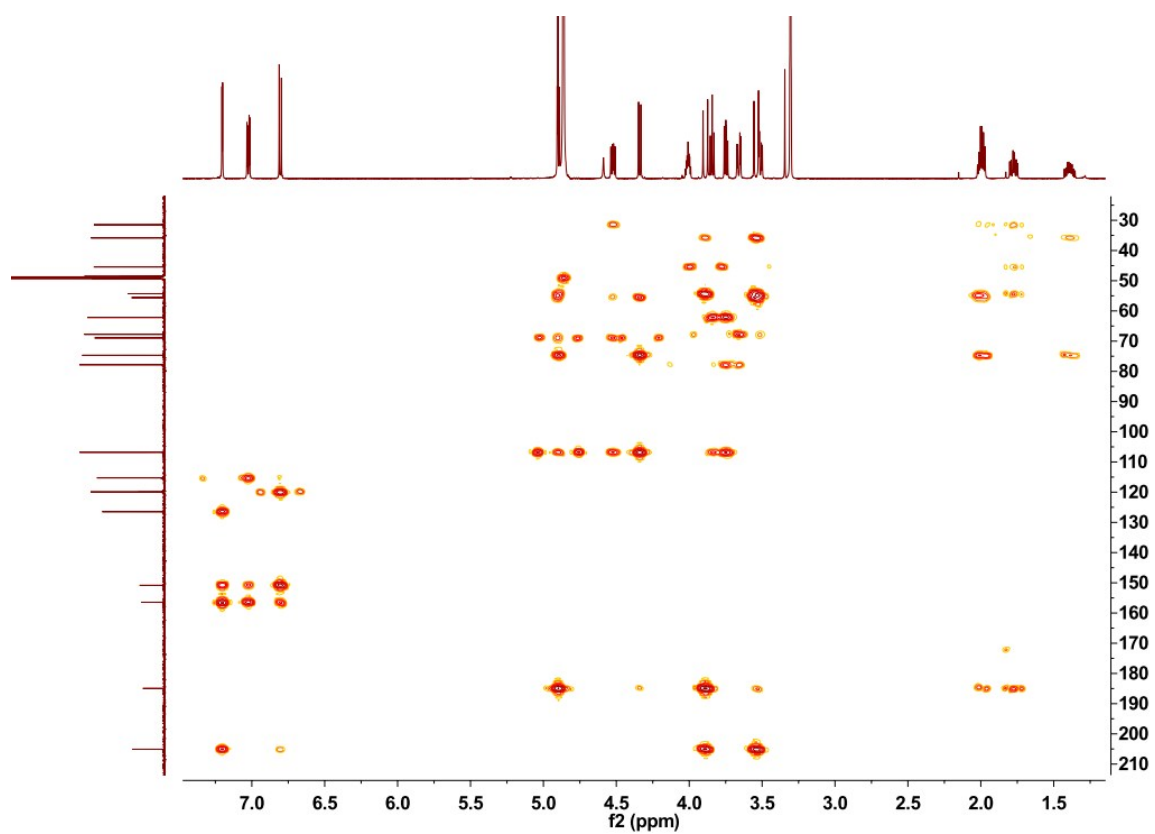

Figure S11. HMBC spectrum of **1** in methanol- $d_4$

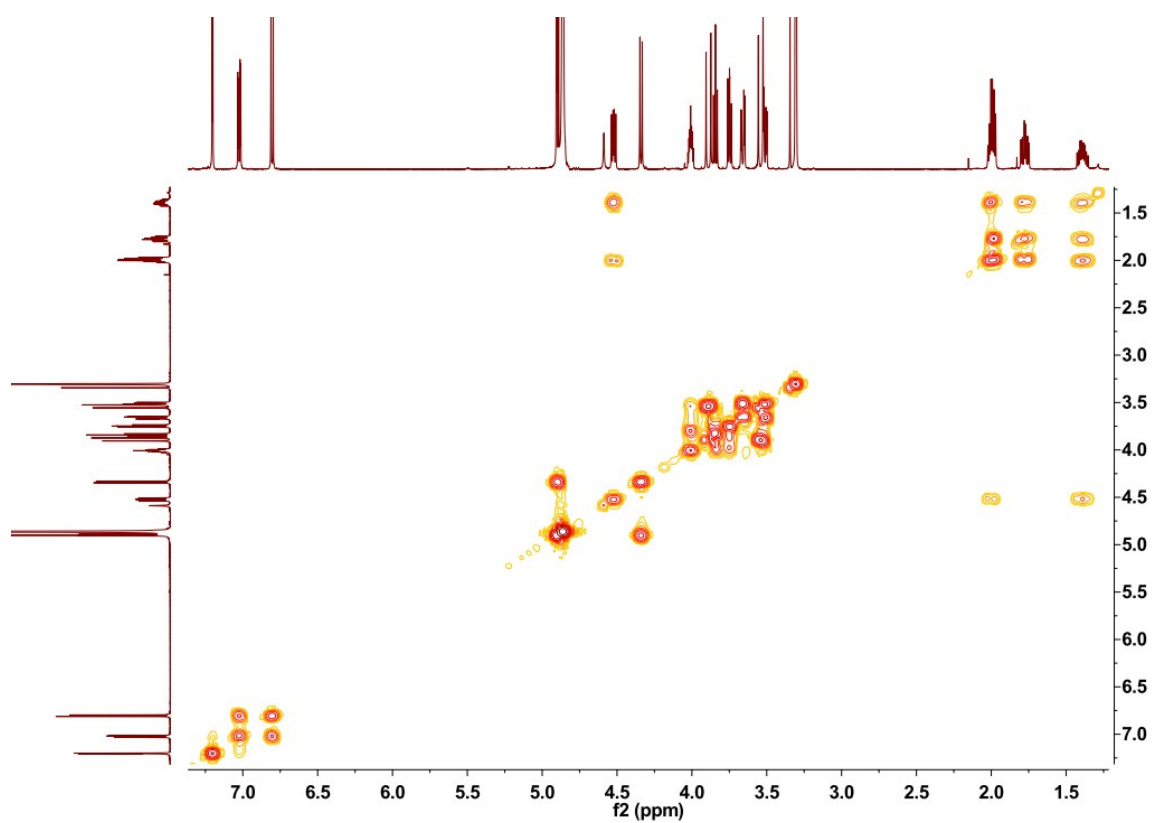

Figure S12.  $^1\text{H}$ - $^1\text{H}$  COSY spectrum of **1** in methanol- $d_4$

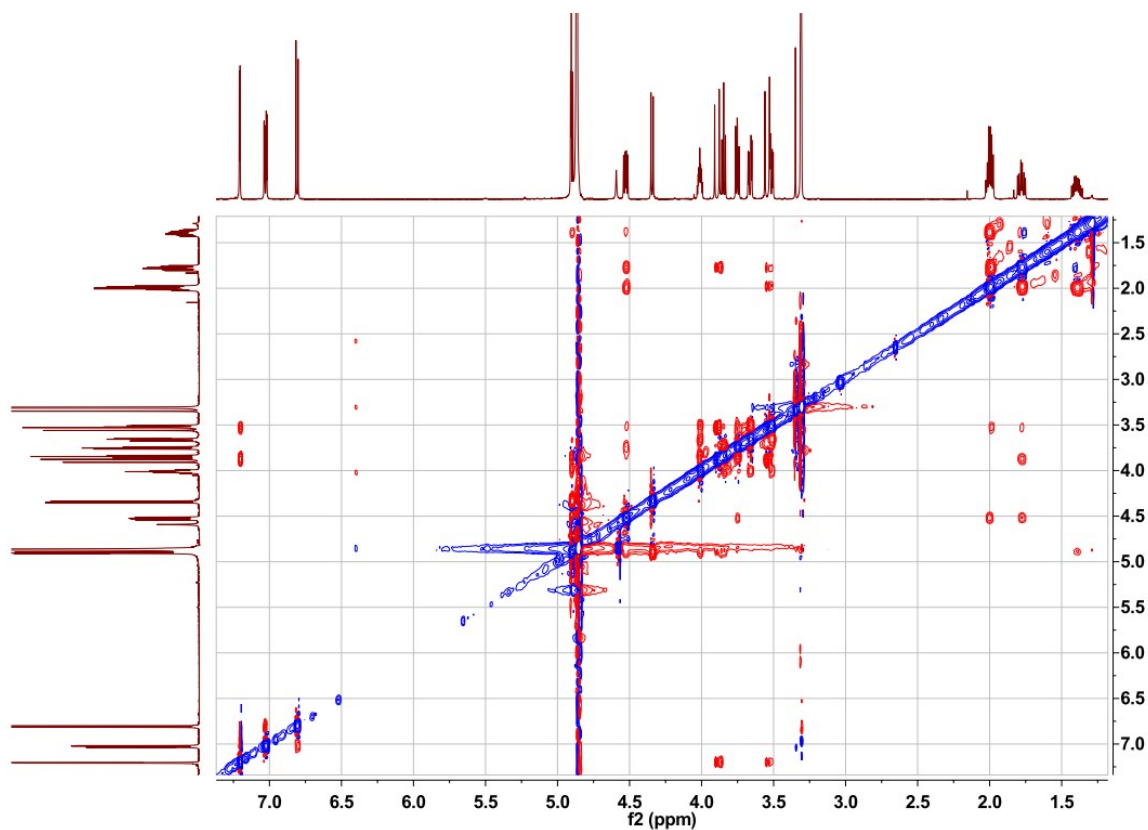

Figure S13. ROESY spectrum of **1** in methanol- $d_4$

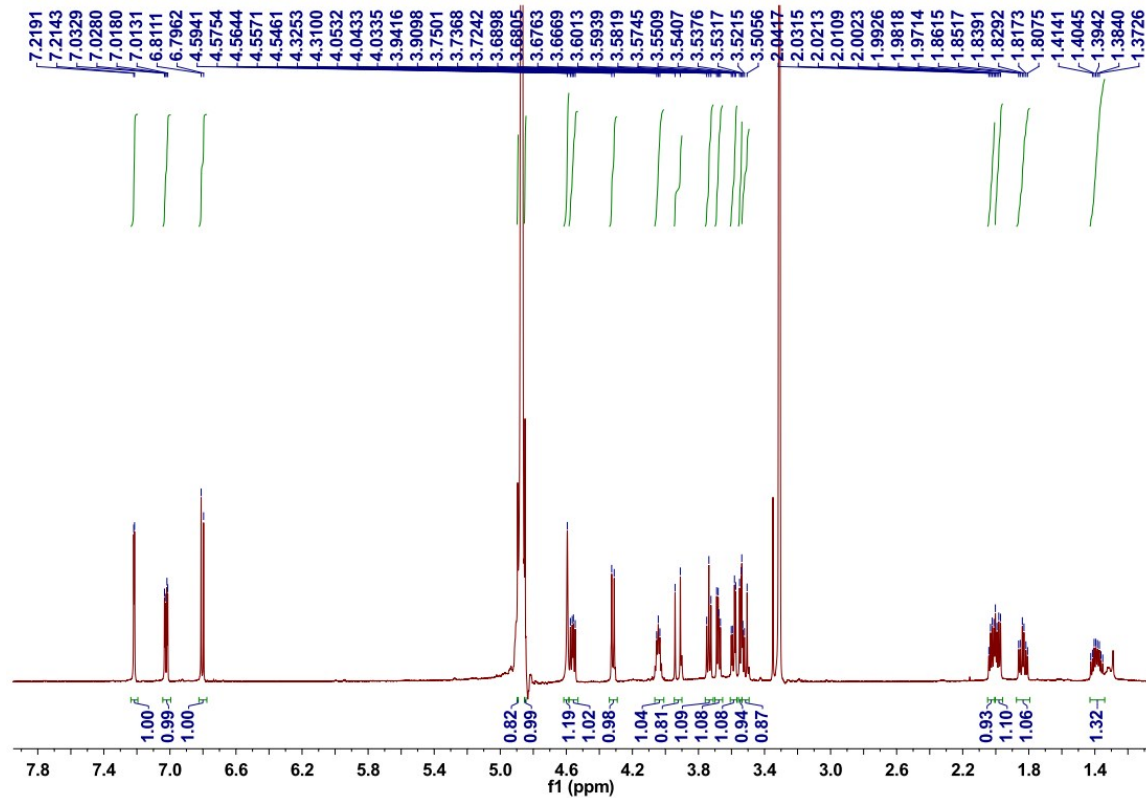

Figure S14.  $^1\text{H}$  NMR spectrum of **2** in methanol- $d_4$

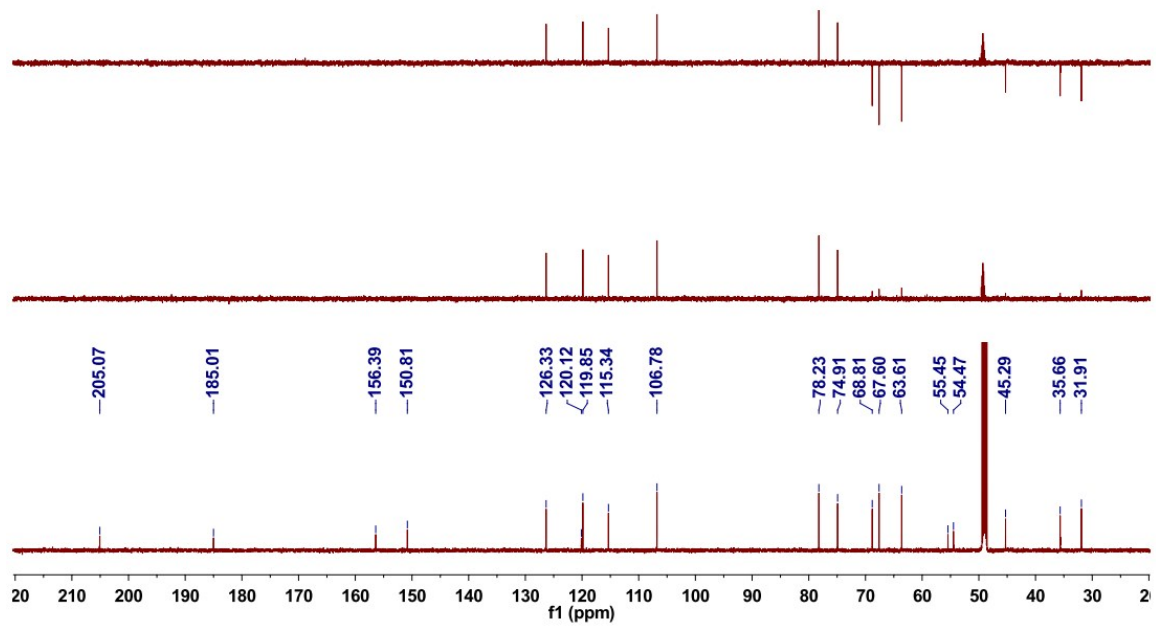

Figure S15.  $^{13}\text{C}$  NMR and DEPT spectra of **2** in methanol- $d_4$

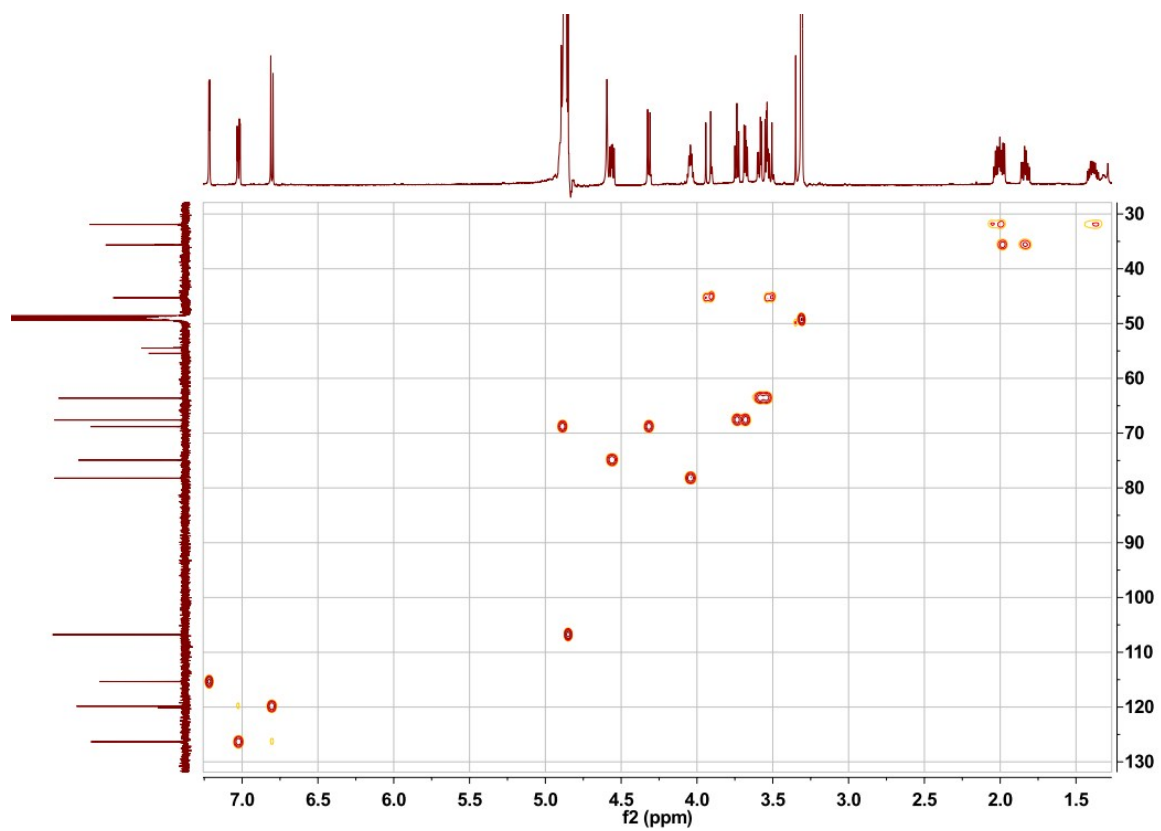

Figure S16. HSQC spectrum of **2** in methanol- $d_4$

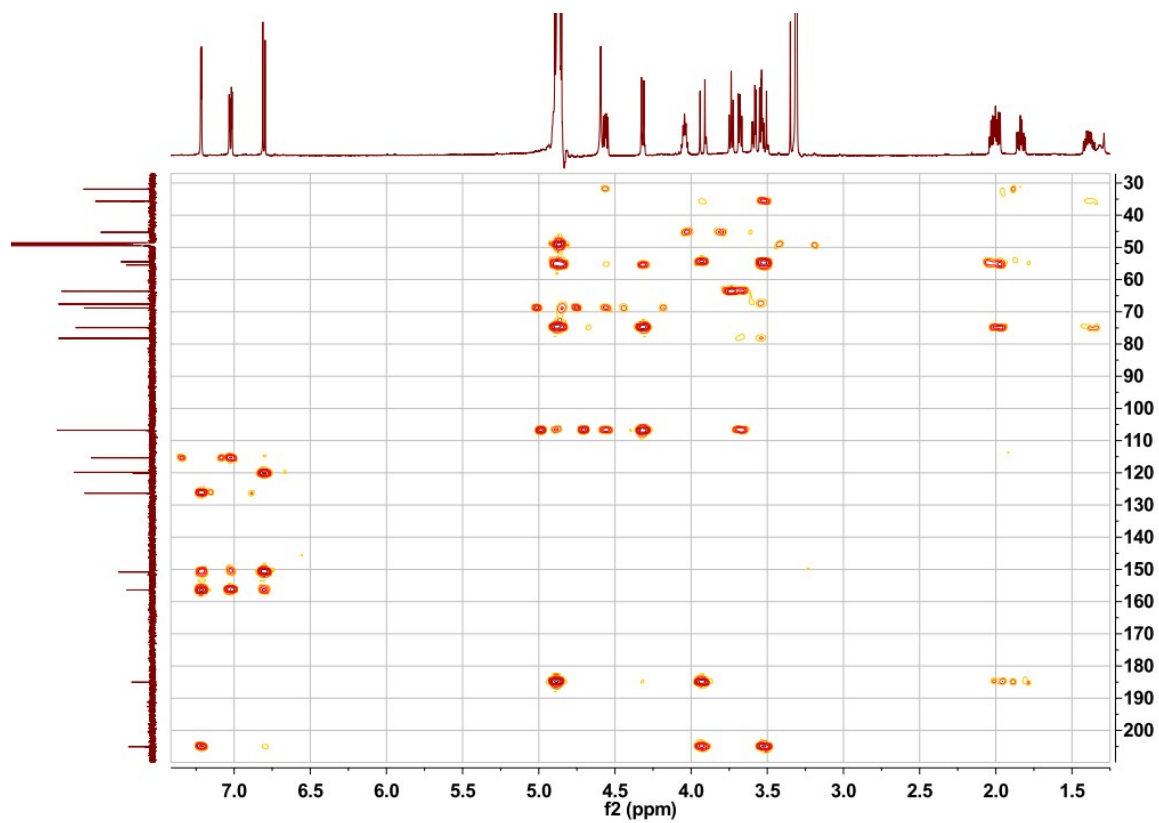

Figure S17. HMBC spectrum of **2** in methanol- $d_4$

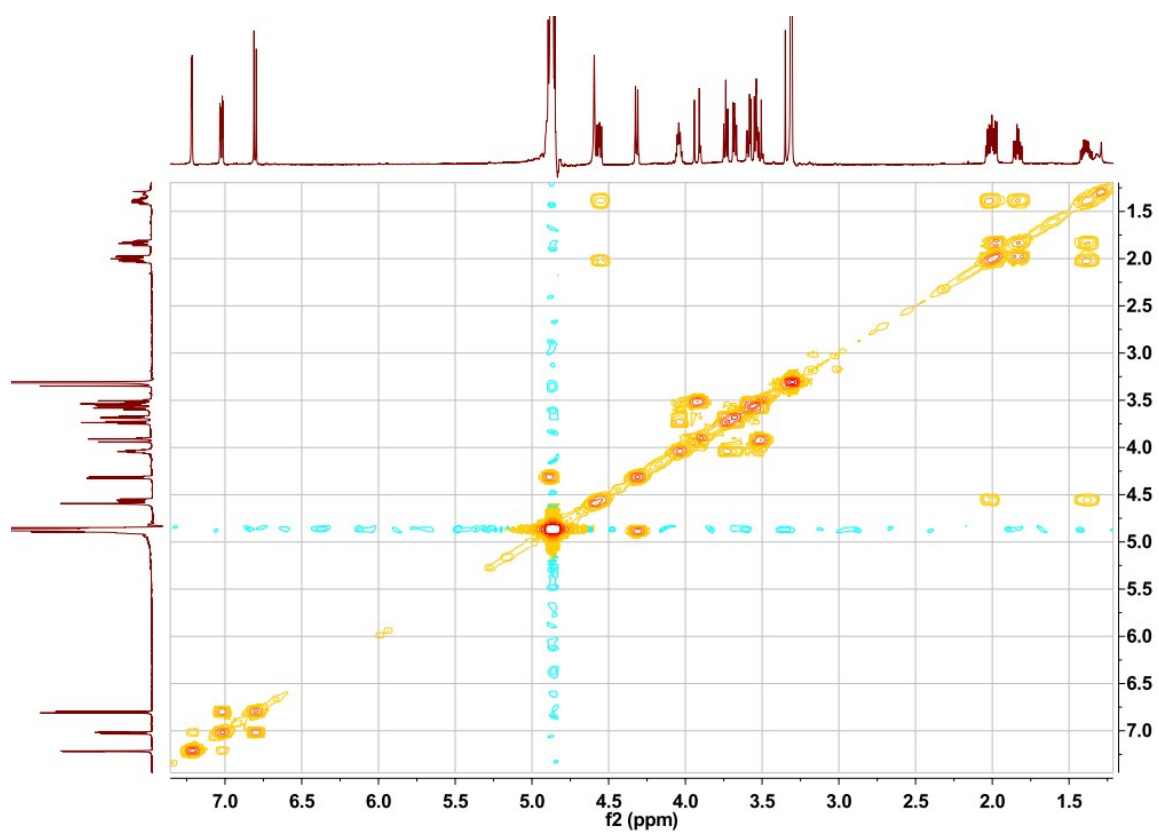

Figure S18.  $^1\text{H}$ - $^1\text{H}$  COSY spectrum of **2** in methanol- $d_4$

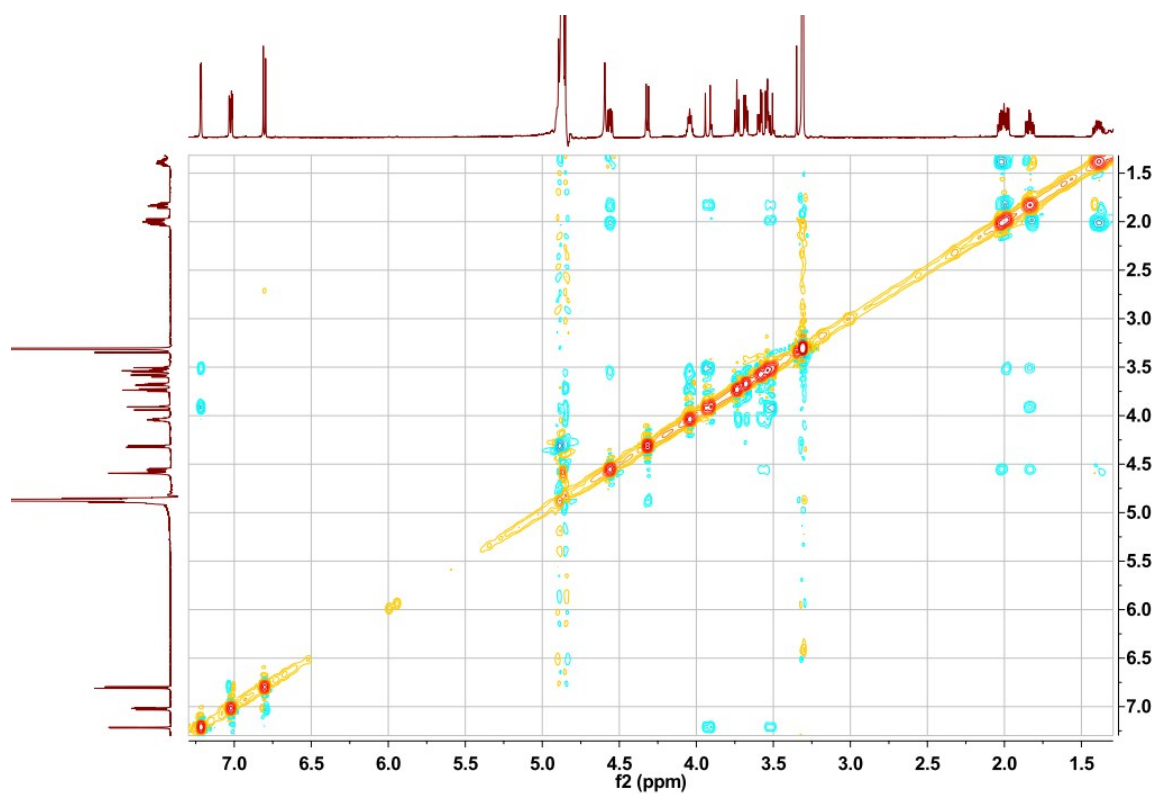

Figure S19. ROESY spectrum of **2** in methanol- $d_4$

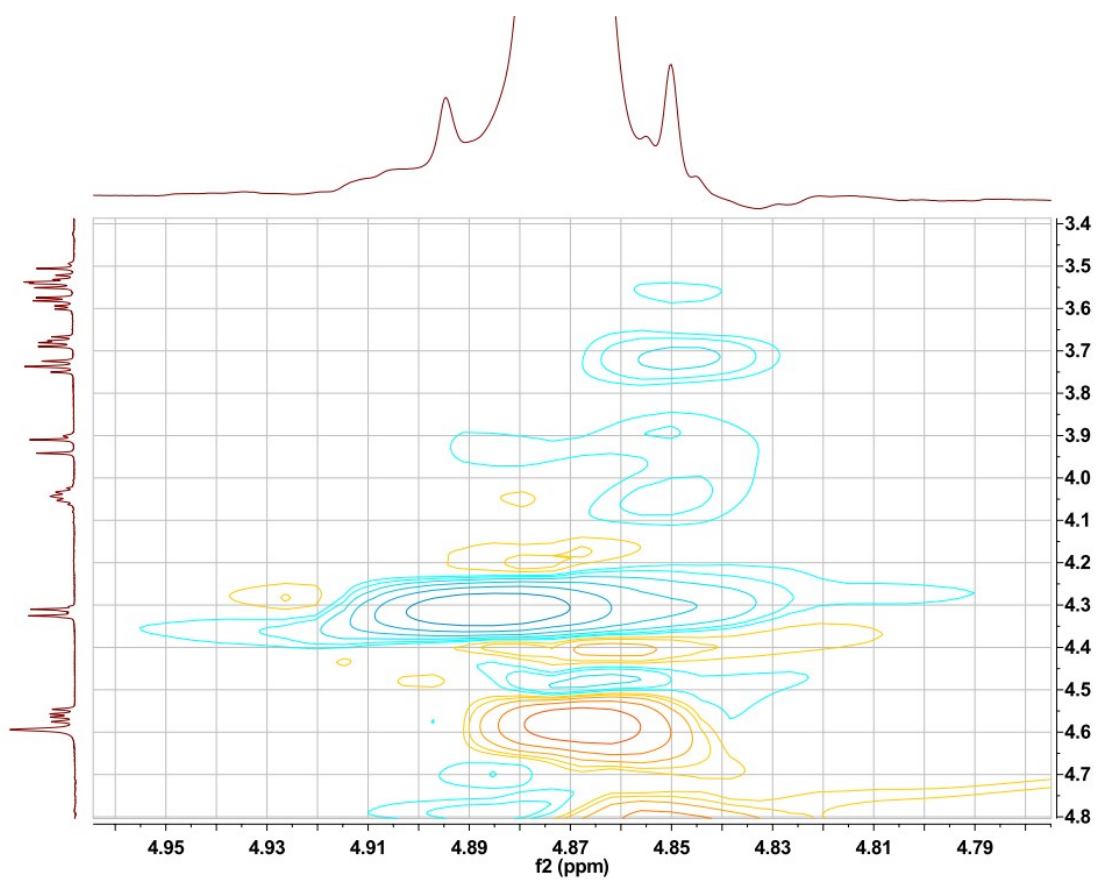

Enlarged ROESY spectrum of **2** (middle-field region) in methanol- $d_4$

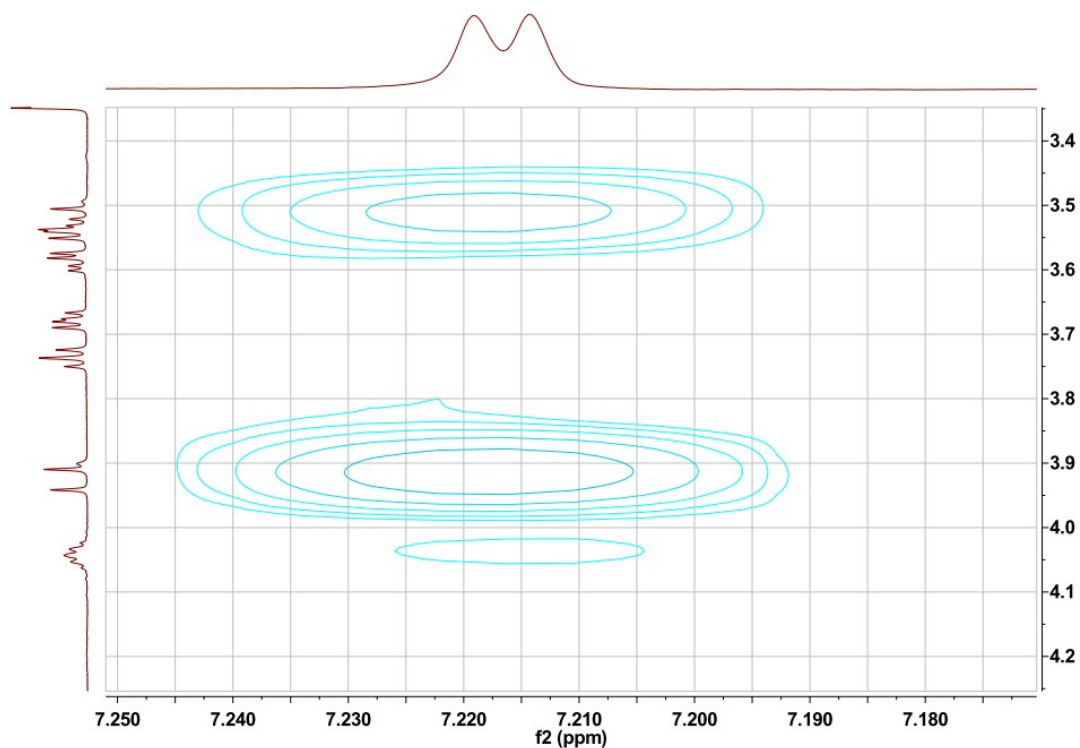

Enlarged ROESY spectrum of **2** (H-3/H-11') in methanol- $d_4$

**Single Mass Analysis**

Tolerance = 10.0 PPM / DBE: min = -10.0, max = 120.0  
 Selected filters: None

Monoisotopic Mass, Odd and Even Electron Ions  
 16 formula(e) evaluated with 1 results within limits (up to 51 closest results for each mass)

Elements Used:

C: 0-200 H: 0-400 O: 8-10

QPG-114

09:26:26 22-Apr-2015

Voltage E1+

M150422EA-04AFAMM 22 (2.020)  
 KIB  
 394.1255

Autospec Premier  
 P776  
 60.7

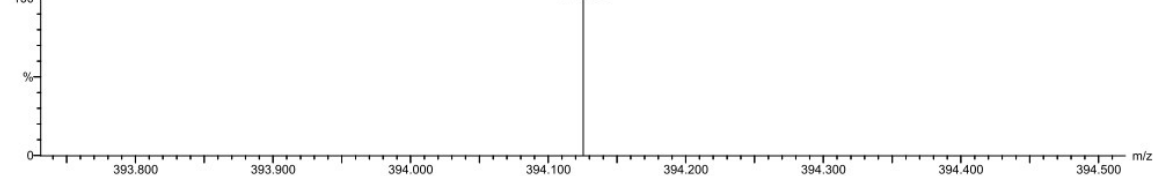

Minimum: -10.0  
 Maximum: 200.0 10.0 120.0

| Mass     | Calc. Mass | mDa  | PPM  | DBE | i-FIT     | Formula    |
|----------|------------|------|------|-----|-----------|------------|
| 394.1255 | 394.1264   | -0.9 | -2.3 | 9.0 | 5546044.5 | C19 H22 O9 |

Figure S20. HREIMS spectrum of **2**
